# Supplementary material for: Microporous polyimides with functional groups for the adsorption of carbon dioxide and organic vapors
Source: Royal Society of Chemistry journal article supplement (doi:10.1039/c6ta04337b), 2016-01-01
Supplement: c6ta04337b1.pdf [file c6ta04337b1.pdf]

## Supporting Information

### Microporous Polyimides with Functional Groups for Adsorption of Carbon Dioxide and Organic Vapors

Guiyang Li,<sup>ab</sup> Biao Zhang,<sup>a</sup> Jun Yan<sup>a</sup> and Zhonggang Wang<sup>\*a</sup>

<sup>a</sup> Department of Polymer Science and Materials, School of Chemical Engineering, Dalian University of Technology, Dalian 116024, China

<sup>b</sup> Aerospace Research Institute of Materials & Processing Technology, Beijing, 100076, China

Email: zgwang@dlut.edu.cn

#### Contents

**Table S1.** Elemental analysis data of the polyimide networks.

**Table S2.**  $K_H$ ,  $A_o$  and  $A_l$  values of CO<sub>2</sub> adsorption in the polyimide networks.

**Figure S1.** X-ray diffractions of the four polyimide networks.

**Figure S2.** Experimental pure component isotherms for CO<sub>2</sub>, CH<sub>4</sub> and N<sub>2</sub> at 273 K and their single-site Langmuir-Freundlich fitting curves for CO<sub>2</sub>, CH<sub>4</sub> and N<sub>2</sub> for microporous polyimides.

**Figure S3.** IAST selectivities for 0.15/0.85 CO<sub>2</sub>/N<sub>2</sub> mixture and 0.05/0.95 CO<sub>2</sub>/CH<sub>4</sub> mixture for the four microporous polyimides.

**Figure S4.** Adsorption selectivities of CO<sub>2</sub> over CH<sub>4</sub> and N<sub>2</sub> for MPI-6FA, API-6FA, MPI-BTA and MPI-BPA from initial slope calculated according to their adsorption isotherms at 273 K.

**Figure S5.** Virial plots of CO<sub>2</sub> adsorption in microporous polyimides at 273 and 298 K.

**Table S1.** Elemental analysis data of microporous polyimides

| Sample  | Theoretical value |      |      | Measured value |      |      |
|---------|-------------------|------|------|----------------|------|------|
|         | C                 | H    | N    | C              | H    | N    |
| MPI-6FA | 63.11             | 2.52 | 4.67 | 62.54          | 2.73 | 4.29 |
| API-6FA | 65.56             | 3.21 | 4.25 | 64.98          | 3.22 | 4.11 |
| MPI-BPA | 75.99             | 3.58 | 6.22 | 73.52          | 3.76 | 5.39 |
| MPI-BTA | 74.21             | 3.17 | 5.87 | 72.49          | 3.72 | 5.29 |

**Table S2**  $K_H$ ,  $A_0$  and  $A_1$  values of CO<sub>2</sub> adsorption in the microporous polyimides.

| Sample  | $T/K$ | $K_H /$<br>mol/(g Pa)  | $A_0 / \ln(\text{mol}/(\text{g Pa}))$ | $A_1 / \text{g/mol}$ |
|---------|-------|------------------------|---------------------------------------|----------------------|
| MPI-6FA | 273   | $1.481 \times 10^{-7}$ | -15.508                               | -798.404             |
|         | 298   | $5.102 \times 10^{-8}$ | -16.791                               | -666.895             |
| API-6FA | 273   | $1.113 \times 10^{-7}$ | -16.011                               | -717.668             |
|         | 298   | $3.592 \times 10^{-8}$ | -17.142                               | -373.790             |
| MPI-BPA | 273   | $1.388 \times 10^{-7}$ | -15.790                               | -904.057             |
|         | 298   | $4.140 \times 10^{-8}$ | -17.000                               | -673.458             |
| MPI-BTA | 273   | $1.866 \times 10^{-7}$ | -15.494                               | -1063.009            |
|         | 298   | $5.237 \times 10^{-8}$ | -16.765                               | -876.878             |

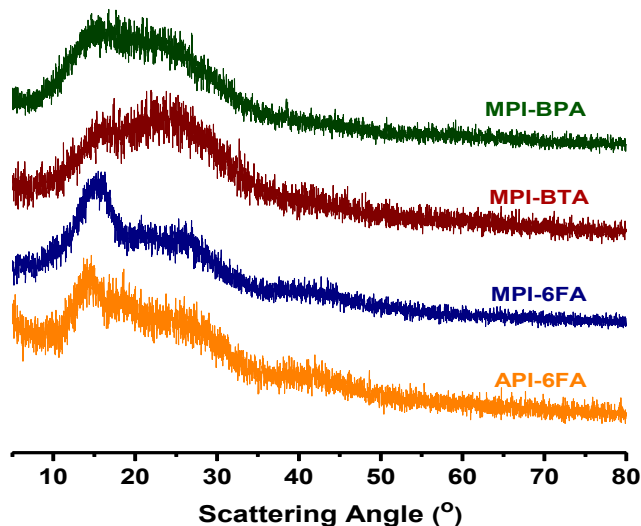

Figure S1. X-ray diffractions of the four polyimide networks.

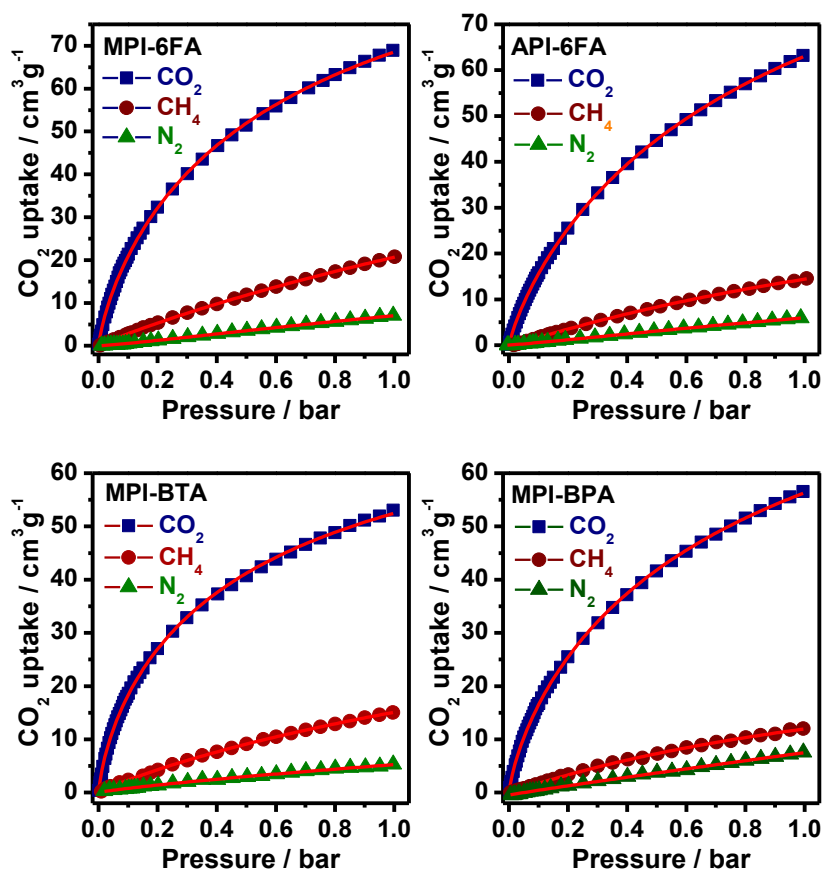

Figure S2. Experimental pure component isotherms for CO<sub>2</sub>, CH<sub>4</sub> and N<sub>2</sub> at 273 K (dot), and their single-site Langmuir-Freundlich fitting curves for CO<sub>2</sub>, CH<sub>4</sub> and N<sub>2</sub> (solid) for microporous polyimides.

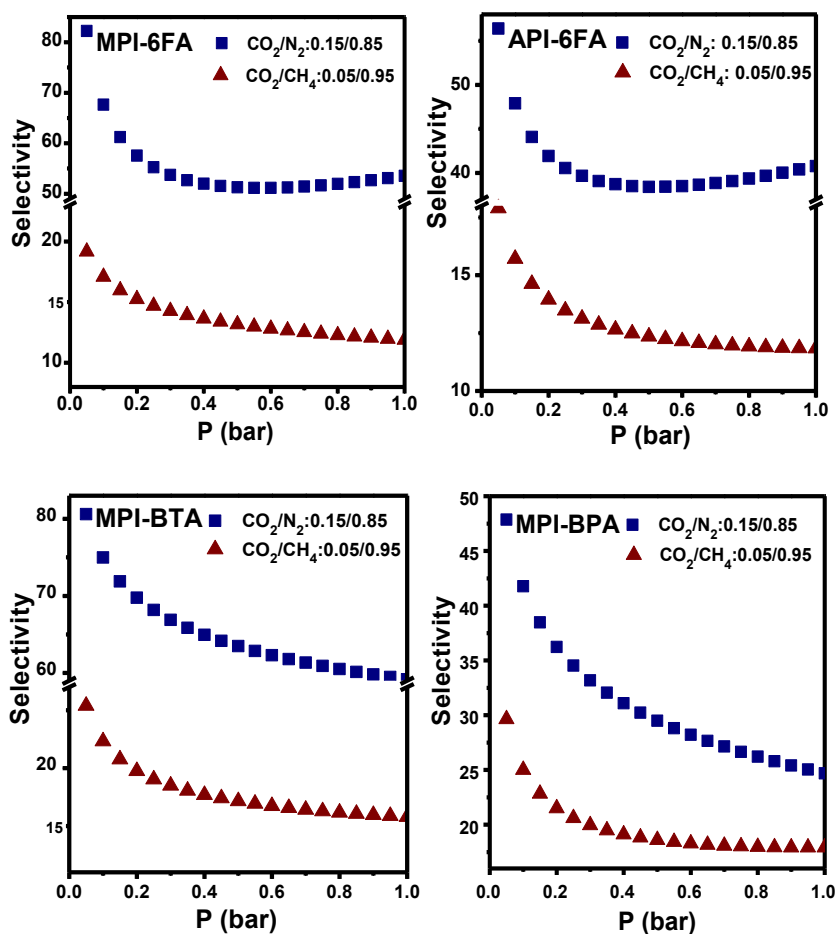

**Figure S3.** IAST selectivities for 0.15/0.85 CO<sub>2</sub>/N<sub>2</sub> mixture (■, blue) and 0.05/0.95 CO<sub>2</sub>/CH<sub>4</sub> mixture (▲, red) for the four microporous polyimides.

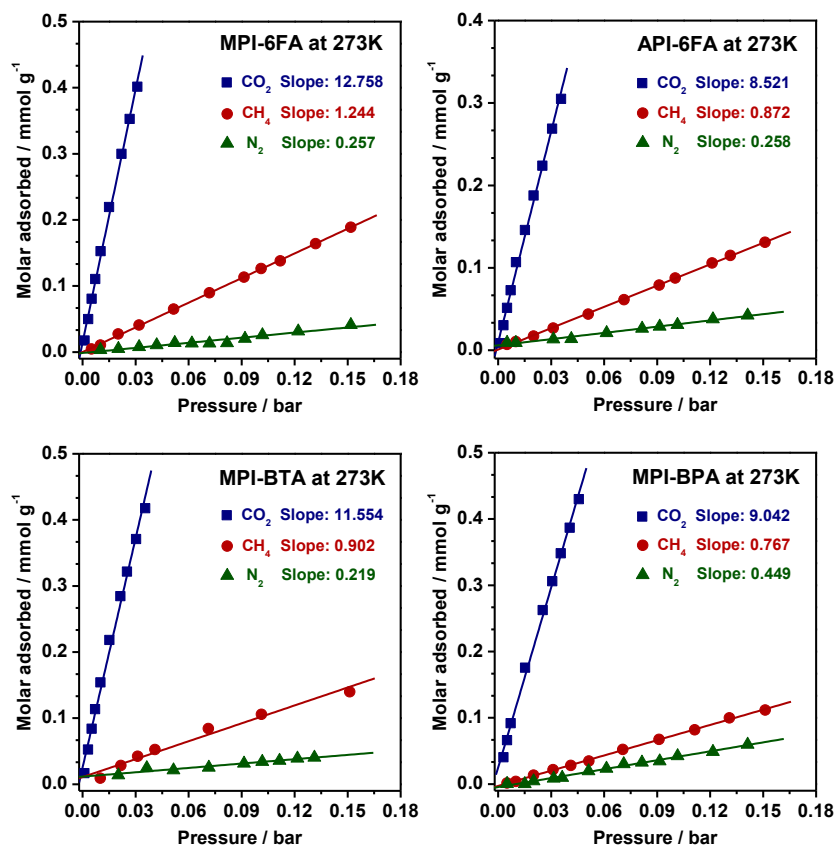

**Figure S4.** Adsorption selectivities of CO<sub>2</sub> over CH<sub>4</sub> and N<sub>2</sub> for MPI-6FA, API-6FA, MPI-BTA and MPI-BPA from initial slope calculated according to their adsorption isotherms of CO<sub>2</sub> (blue), CH<sub>4</sub> (red) and N<sub>2</sub> (green) at 273 K.

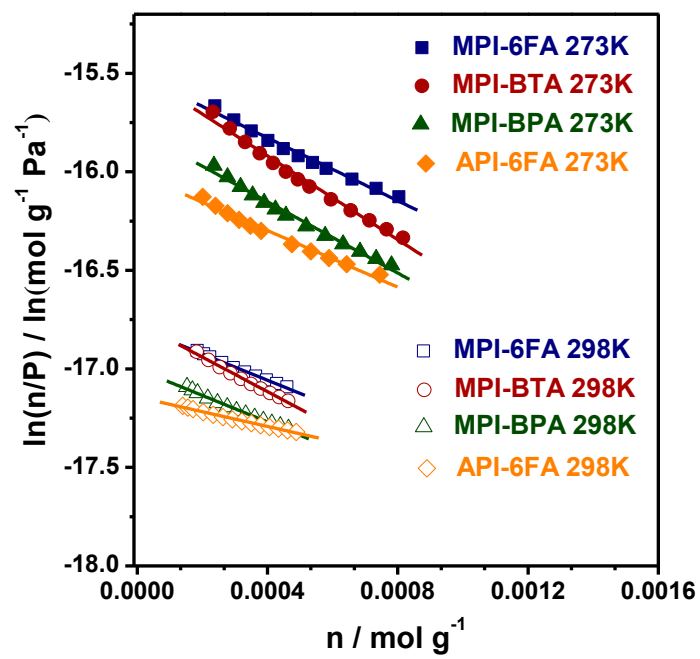

Figure S5. Virial plots of CO<sub>2</sub> adsorption in microporous polyimides at 273 and 298 K.
